# Supplementary material
Source: Springer Nature journal article supplement (https://www.springermedizin.de/resource/supplementary/13601_2011_264_MOESM4_ESM.pdf/9677260)

# Sputum EOS (%)

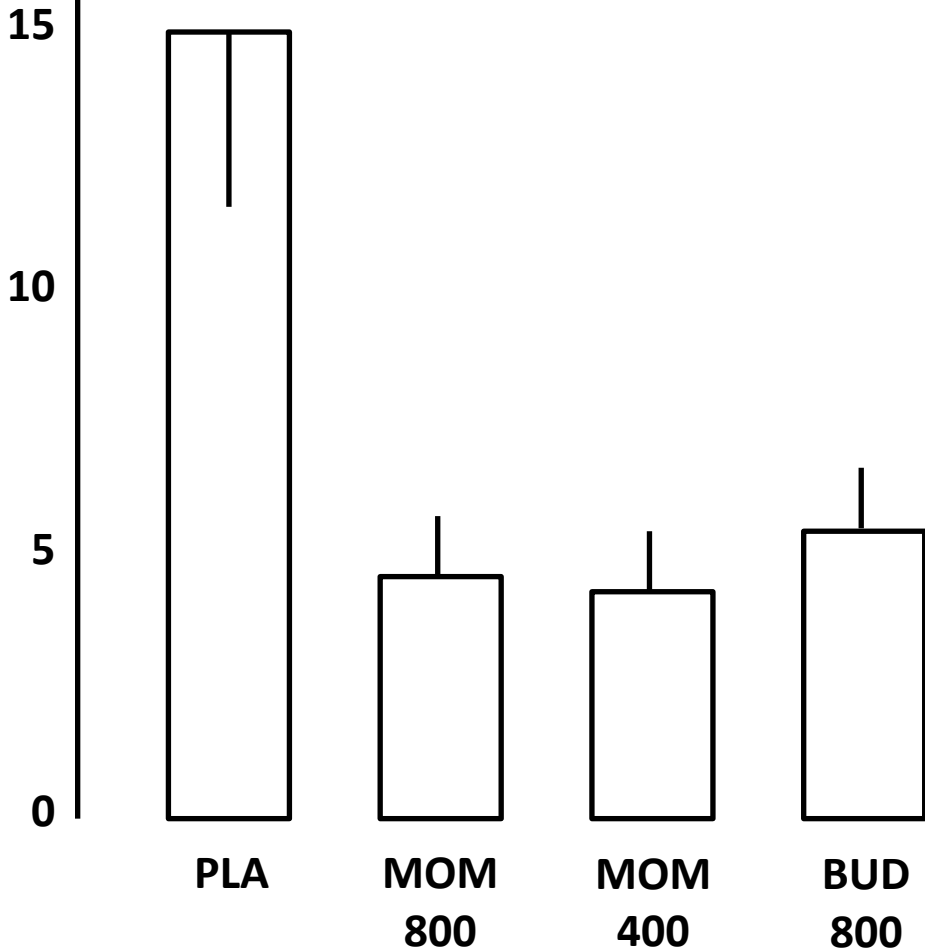

Supplement: MOESM4 [file 9677260]
